# Supplementary material for: Amperometric detection of antibodies in serum: performance of self-assembled cyclodextrin/cellulose polymer interfaces as antigen carriers
Source: Royal Society of Chemistry journal article supplement (doi:10.1039/c1ob05473b), 2011-01-01
Supplement: c1ob05473b.doc [file c1ob05473b.doc]

# Electronic Supplementary Information

**Amperometric detection of antibodies in serum: performance of self-assembled cyclodextrin/cellulose polymer interfaces as antigen carriers**

*Mayreli Ortiz, Alex Fragoso,* Ciara K. O´Sullivan**

Nanobiotechnology & Bioanalysis Group, Departament d’Enginyeria Química, Universitat Rovira i Virgili, Avinguda Països Catalans 26, 43007 Tarragona, Spain.

E-mail: alex.fragoso@yrv.cat, ciara.osullivan@urv.cat

**1. Reagents and materials**

All chemicals used were of analytical grade and used as received without any further purification. -cyclodextrin was a generous gift from Roquette (France); CD and CD were obtained from Wacker Chemie and used as received. Epichlorhydrin, carboxymethyl cellulose sodium salt (CMC, MW 90 kDa) cystamine, potassium hexacyanoferrate, 1-ethyl-3-(3-dimethyl-aminopropyl) carbodiimide hydrochloride (EDC), phosphate-buffered saline (PBS) with 0.05% v/v Tween 20 (dry powder), hydroquinone (HQ), adamantane-1-carboxylic acid (ADA-COOH), gliadin and anti-mouse IgG (whole molecule)–peroxidase antibody produced in goat (Ab-HRP) were purchased from Sigma-Aldrich. 3,5,7-trimethyl-adamantane-1-carboxylic acid (TMADA-COOH) was purchased from Acros Organics.

The thiolated –cyclodextrin polymer (-CDPSH, degree of substitution: 13 mol SH per mol polymer) was prepared as previously described.[[1]](#footnote-2) Analog polymers derived from CD and CD were prepared using the same strategy.

All solutions were prepared with Milli-Q water (Millipore Inc., Ω = 18 MΩ·cm). Monoclonal anti-gliadin antibody and serum samples were kindly provided by H. J. Ellis (King’s College London) and used as received.

**2. Syntheses**

a) NaIO4, b) 1,6-diaminohexane, c) NaBH4, d) EDC-activated ADA-COOH or TMADA-COOH, e) EDC, f) digested gliadin. GLI: gliadin fragment

**2.1 Synthesis of adamantane-containing carboxymethyl cellulose polymers (4a,b)**

*Step 1. Amination of CMC:* 1 g of carboxymethyl cellulose sodium salt (**1**) was dissolved in 10 mL of MilliQ water and oxidized with 0.2 g of sodium meta-periodate (NaIO4) in the dark under stirring conditions for 24 hours to produce a poly-aldehyde (**2**). The solution was then dialysed against MilliQ water using a dialysis membrane of molecular weight cut-off (MWCO) 10 kDa (Sigma), to remove the excess of oxidant. To check if oxidant removal was complete, a few drops of 2% silver nitrate were added to a small sample of dialysate. Absence of turbidity (mainly due to AgIO4) indicated that there was no further oxidant in the dialysed solution. The product was concentrated to about half of the initial volume under vacuum at 40ºC.

The resulting poly-aldehyde (**2**) was reacted with 0.5 g of 1,6-diaminohexane under stirring conditions for 1 hour and then reduced with 0.5 g of sodium borohydride. The new solution was protected from light and maintained under stirring conditions for a further 24 hours, and was then concentrated to about half of the initial volume and allowed to dialyze for 24 hours to remove non-reacted material. The dialysed solution was concentrated to dryness to give aminated polymer **3** and stored under vacuum (Yield: 0.7 g). 1H-NMR (300 MHz, D2O, 300 K) (ppm): 2.0-3.2 (m, N(C*H*2)6N); 3.2-4.6 (m, glucose skeletal protons); 4.9-5.3 (anomeric protons).

*Step 2. Activation of adamantane carboxylic acid*. ADA-COOH or TMADA-COOH (0.5 g) were dissolved in methanol and treated with sodium methoxide 25% (w/w) solution in methanol until the precipitation of the corresponding sodium salt, which was washed several times with cold methanol and dried under vacuum. The water-soluble sodium salt (0.2 g) was dissolved in 2 mL of 0.1 M acetate buffer (pH 5), treated with 1 equivalent of EDC at 4ºC for 1 hour and used immediately in the next step.

*Step 3. Introduction of adamantane units in CMC:* 0.2 g of **3** were dissolved in 20 mL of 0.1 M acetate buffer pH 5 and treated with the previously prepared solution of activated ADA or TMADA acid. The reaction mixture was stirred at 4ºC for 1 hour, then at room temperature overnight. The mixture was concentrated to about half the initial volume and left to dialyze for 24 hours to remove non-reacted material, and was then concentrated to dryness to give **4a,b** and stored under vacuum (Yield: 0.21-0-26 g). 1H-NMR (300 MHz, D2O, 300 K) (ppm): 0.5-1.2 (m, adamantane protons); 2.0-3.2 (m, N(CH2)6N); 3.2-4.6 (m, glucose skeletal protons). 4.9-5.3 (anomeric protons).

**2.2 Synthesis of 5a,b**

*Step 1. Gliadin digestion*:[[2]](#footnote-3) Since gliadin is hydrophobic in nature, an enzymatic pretreatment with pepsin and trypsin (both attached to agarose beads) was carried out in order to form soluble polypeptides of the gliadin able to react with the water-soluble CMC polymer. 1 g of gliadin (from Sigma-Aldrich) dissolved in 50 ml of diluted HCl at pH 2.0 was treated with 0.06 g (4000 U) of pepsin. The mixture was magnetically stirred at 37ºC and after 2 hours centrifuged for 20 minutes at 6000 rpm. The supernatant was adjusted to pH 7.8 with 0.1 M NaOH and 1 mL of trypsin suspension (25 U) was added. After 2 hours of incubation at 37ºC with magnetic stirring the pH was adjusted to 7.0 with 0.1 M HCl and the digest centrifuged for 20 minutes at 6000 RPM. The resulting product was then freeze-dried and stored at -20 ºC. MALDI-TOF analysis of the digested product showed the presence of major molecular peaks in the range of 1900-2700 *m/z*. IR (KBr) **max (cm−1): 1640, 1525 (s, C=O amide), 1440 (m, C-N). UV-Vis max (H2O): 280 nm.

*Step 2. Conjugation of digested gliadin to* ***4****.* 0.06 g of **4** were dissolved in 5 mL of 0.1 M acetate buffer at pH 5. To this solution, EDC (0.2 g) was added and the mixture was stirred for 1 hour at 4ºC. Gliadin was conjugated by adding 0.01 g of digested gliadin to the activated polymer and the solution was stirred overnight and purified using a Microcon® centrifugal filter device (MW cut-off 10 kDa) and freeze-dried to give **5**. IR (KBr),**max (cm−1): 1641, 1529 (s, C=O amide), 1601 (s, COO-), 1446 (m, C-N). UV-Vis max (H2O): 279 nm.

**2.3 Synthesis of 6**

0.06 g of amine **3** was dissolved in 5 mL of 0.1 M acetate buffer at pH 5. To this solution, EDC (0.2 g) was added and the mixture was stirred for 1 hour at 4ºC. Gliadin was conjugated by adding 0.01 g of digested gliadin to the activated polymer and the solution was stirred overnight and purified using a Microcon® centrifugal filter device (Mw cut-off 10 kDa) and freeze-dried to give **5**. UV-Vis max (H2O): 279 nm.

**3 Measurements**

**3.1 Surface plasmon resonance (SPR) studies.**

SPR studies were carried out in a Biacore® 3000 instrument operating at 20°C. Gold chips from a Biacore SIA kit were firstly cleaned by treatment with ozone using a PSD-UVT cleaning instrument (from Novascan, USA) for 10 min followed by rinsing with ethanol and drying under a filtered Ar stream. The chip was modified with CDPSH by overnight immersion in a 10 mg/mL solution followed by extensive rinsing with water, after which the chip was mounted in the Biacore support and a 20 L/min flow of running buffer (10 mM PBS pH 7.0) was established. After baseline stabilization (~ 3 hours) a layer of **5a** was created by injecting 5 L aliquots of a 1 g/mL solution in PBS until signal saturation. Surface regeneration studies were carried out using 1 mM adamantane-1-carboxylate or 0.1% v/v SDS in water to regenerate the CDPSH surface, or 10 mM glycine buffer pH 2 to regenerate the antigen surface. To calculate the concentration changes on the sensor surface an equivalence of 1 RU = 1 pg/mm2 was used.

**3.2 Electrochemical Instrumentation.**

Electrochemical measurements were performed on a PC controlled PGSTAT12 Autolab potentiostat (EcoChemie, The Netherlands) with a built-in frequency response analyzer FRA2 module. Electrochemical impedance measurements were performed using a standard three-electrode configuration (reference electrode, Ag/AgCl(sat), counter electrode Pt wire) in 1 mM K3[Fe(CN)6] in 0.15 M KCl. Electrochemical impedance experiments were performed at the formal potential of 0.20 V vs Ag/AgCl with an amplitude of 5 mV at the frequency range from 100 kHz to 10 mHz. A Nyquist plot (*Z’* vs –*Z’’*) was drawn to analyze the impedance results.

Electrode arrays were fabricated as previously described, consisting of 16 gold working electrodes (dimensions: 1  1 mm2) arranged in a 44 disposition.[[3]](#footnote-4) Each working electrode is placed between a silver pseudo reference 0.2  1 mm2 and a gold counter electrode of the same size. The working electrodes were electrocleaned by applying a series of 25 potential cycles in 1 M H2SO4 in the range 0-1.6 V vs. Ag/AgCl. The quality of the cleaning step was checked using cyclic voltammetry of 1 mM K3[Fe(CN)6] in 0.1 M KCl. Samples were spotted on the working electrodes using a spotting device fabricated as previously reported.[[4]](#footnote-5)

**3.3 Modification of gold electrodes and antibody detection.**

In a first step, the electrodes were spotted with 5 L of a 10 mg/mL CDPSH solution and incubated overnight to form a SAM containing cyclodextrin hosts. After rinsing with water, 5 μL of a 5 mg/mL ADA-CMC-GLI solution were spotted and allowed to incubate overnight. The next incubation steps were carried out immediately prior to amperometric measurements. For this purpose, 5 μL of anti-gliadin antibody of the appropriate concentration in PBS pH 7 was incubated for 30 minutes. After rinsing with water, a solution of secondary antibody-HRP conjugate was added and the sensor further incubated for 10 minutes.

To study the effect of serum, mixtures of PBS pH 7 and fetal calf serum of composition 0:100, 50:50 and 25:75 (v/v) were spiked with 1 μg/mL anti-gliadin antibody.

The amperometric measurements were carried out by first recording the background response at –0.2 V in PBS buffer pH 6 followed by injection of a mixture of 1 mM hydroquinone/1 mM H2O2 in 0.1 M PBS pH 6 + 0.15 M KCl.

**4. Calibration curve.**

**Figure S1.** Dependence of amperometric signal with antibody concentration for the system AuCDPSH|**5a**.

**5. Effect of serum on antibody detection.**

**Figure S2.** Effect of different serum:PBS ratios on the amperometric response obtained for the detection of 1 g/mL of anti-gliadin antibody using the system Au|CDPSH|**5a**.

1. Fragoso, A.; Sanromà, B.; Ortiz, M.; O’Sullivan, C. K. *Soft Matt.* 2009, **5**, 400 [↑](#footnote-ref-2)
2. Kilmartin, C.; Lynch, S.; Abuzakouk, M.; Wieser, H.; Feighery, C. *Gut* 2003, **52**, 47. [↑](#footnote-ref-3)
3. Henry, O. Y. F.; Fragoso, A.; Beni, V.; Laboria, N.; Acero Sánchez, J. L.; Latta, D.; Von Germar, F.; Drese, K.; Katakis, I.; O’Sullivan, C. K. *Electrophoresis* 2009, **30**, 3398. [↑](#footnote-ref-4)
4. Laboria, N.; Fragoso, A.; Kemmner, W.; Latta, D.; Nilsson, O.; Botero, M. L.; Drese, K.; O’Sullivan, C. K. *Anal. Chem.* 2010**, 82***,* 1712. [↑](#footnote-ref-5)
